# Supplementary material
Source: ML conference proceedings conference paper supplement (https://proceedings.neurips.cc/paper_files/paper/2022/hash/b51693c2ba5b5ddf67429966576fb962-Abstract.html)
Supplement: Supplementary file 1 [file b51693c2ba5b5ddf67429966576fb962-Supplemental-Conference.zip]

Archive with 44 entries (35 files):
- supp/
- supp/.DS_Store
- __MACOSX/
- __MACOSX/supp/
- __MACOSX/supp/._.DS_Store
- supp/code/
- supp/code/.DS_Store
- __MACOSX/supp/code/
- __MACOSX/supp/code/._.DS_Store
- supp/code/cb/
- supp/code/cb/plot.py
- __MACOSX/supp/code/cb/
- __MACOSX/supp/code/cb/._plot.py
- supp/code/cb/env.py
- __MACOSX/supp/code/cb/._env.py
- supp/code/cb/generate.py
- __MACOSX/supp/code/cb/._generate.py
- supp/code/cb/estimator.py
- __MACOSX/supp/code/cb/._estimator.py
- __MACOSX/supp/code/._cb
- supp/code/rl/
- supp/code/rl/alg.py
- __MACOSX/supp/code/rl/
- __MACOSX/supp/code/rl/._alg.py
- supp/code/rl/eval_cartpole.py
- __MACOSX/supp/code/rl/._eval_cartpole.py
- supp/code/rl/collect_mc.py
- __MACOSX/supp/code/rl/._collect_mc.py
- supp/code/rl/plot.py
- __MACOSX/supp/code/rl/._plot.py
- supp/code/rl/eval_all.py
- __MACOSX/supp/code/rl/._eval_all.py
- supp/code/rl/ms_mc.py
- __MACOSX/supp/code/rl/._ms_mc.py
- supp/code/rl/ms.py
- __MACOSX/supp/code/rl/._ms.py
- supp/code/rl/cartpole.py
- __MACOSX/supp/code/rl/._cartpole.py
- supp/code/rl/mc.py
- __MACOSX/supp/code/rl/._mc.py
- __MACOSX/supp/code/._rl
- __MACOSX/supp/._code
- supp/full.pdf
- __MACOSX/supp/._full.pdf
